# Supplementary material for: A catalog of validity indices for step counting wearable technologies during treadmill walking: the CADENCE-Kids study
Source: PubMed Central journal article supplement (PMC8283935; doi:10.1186/s12966-021-01167-y), 2021-07-16
Supplement: 12966_2021_1167_MOESM1_ESM.pdf [file 12966_2021_1167_MOESM1_ESM.pdf]

**Suppl Table 1** Step counting treadmill validation studies among wearable technologies in youth

| Reference                      | Sample                                              | Protocol<br>(duration and speeds)   | Wearable Technologies                                                                            | Accuracy                                                 | Precision                                                                                               | Bias               |
|--------------------------------|-----------------------------------------------------|-------------------------------------|--------------------------------------------------------------------------------------------------|----------------------------------------------------------|---------------------------------------------------------------------------------------------------------|--------------------|
| <i>Pedometer Studies</i>       |                                                     |                                     |                                                                                                  |                                                          |                                                                                                         |                    |
| Beets, Patton and Edwards 2004 | 20 children (50% females), 5 to 11 years            | 2-min: 40, 54, 67, 80, and 94 m/min | Walk4Life 2505 (WL), Digiwalker SW-200 (DW200), Sun TrekLINQ (SUN) and Digiwalker SW-701 (DW701) | MAPE:<br><br>Only visualized in graph                    | ICC:<br><br>WL: 0.516-0.992<br><br>DW200: 0.727-0.998<br><br>SUN: 0.330-0.971<br><br>DW701: 0.722-0.993 | Not reported       |
| Trapp et al. 2012              | 45 children (51.1% females), age 10.67 ± 0.77 years | 3-min: 40, 67, 91 m/min             | Accuspllit AH120, DigiWalker SW-700                                                              | MAPE:<br><br>AH120 = 46.9-8.6%<br><br>SW-700 = 44.1-8.9% | Not reported                                                                                            | Bland-Altman Plots |

|                                    |                                                 |                                           |                                                                                 |                                                |              |                                                                                                    |
|------------------------------------|-------------------------------------------------|-------------------------------------------|---------------------------------------------------------------------------------|------------------------------------------------|--------------|----------------------------------------------------------------------------------------------------|
| Ramírez-<br>Marrero et al.<br>2002 | 31 children<br>(45.2% females)<br>7 to 12 years | 2 min at 59,<br>70, 91 m/min              | Digiwalker SW-<br>200 (hip; belt),<br>Digiwalker SW-<br>200 (midline;<br>pouch) | MAPE:<br><br>Hip = 1-15%<br><br>Midline = 2-5% | Not reported | Not reported                                                                                       |
| Mitre et al.<br>2009               | 27 children<br>(51.9% females)<br>8 to 12 years | 5-min: 13.4,<br>26.8, 40.2,<br>53.6 m/min | Omron HJ-105,<br>DigiWalker SW-<br>200                                          | Not reported                                   | Not reported | MPE:<br><br>Omron HJ-<br>105 and<br>DigiWalker<br>SW-200: 100-<br>60%<br><br>Bland-Altman<br>Plots |

|                                                    |                                                           |                                             |                                              |              |              |                                                                           |
|----------------------------------------------------|-----------------------------------------------------------|---------------------------------------------|----------------------------------------------|--------------|--------------|---------------------------------------------------------------------------|
| Dueker,<br>Gauderman,<br>and<br>McConnell,<br>2012 | 17 children<br>(58.8% females),<br>aged 10 to 17<br>years | 5-min: 53.6,<br>80.5, 107.3,<br>134.1 m/min | SportBrain iStep<br>X1, Digiwalker<br>SW-701 | MAPE         | Not reported | MPE:<br><br>iStep X1= -<br>1.3 to -3.9%<br><br>SW-701= -<br>19.3 to -4.3% |
| Aminian and<br>Hinckson,<br>2012                   | 25 children (68%<br>females) 9.9 ±<br>0.3 years           | 2-min: 50, 66,<br>93, 133 m/min             | Yamax<br>DigiWalker SW-<br>200 and NL-2000   | Not reported | Not reported | MPE:<br>SW-200:<br>-4% to 1%<br><br>NL-2000:<br><br>-11% to 1%            |
| Rosenkranz,<br>Rosenkranz,<br>and Weber,<br>2011   | 19 children<br>(36.8% female)<br>aged 7–11 years          | 3-min 40.2,<br>80.5, 120.7,<br>161 m/min    | Digiwalker SW-<br>200                        | Not reported | Not reported | MPE: -4%<br><br>(not specified<br>by speeds)                              |

*Accelerometer Studies*

|                                         |                                                  |                                     |                                  |              |                                                                |                                                                 |
|-----------------------------------------|--------------------------------------------------|-------------------------------------|----------------------------------|--------------|----------------------------------------------------------------|-----------------------------------------------------------------|
| Aminian and Hinckson, 2012              | 25 children (68% females) 9.9 ± 0.3 years of age | 2/min: 50, 66, 93, 133 m/min        | ActivPAL                         | Not reported | ICC:<br>ActivPAL: 0.21-1.00                                    | Not reported                                                    |
| Rosenkranz, Rosenkranz, and Weber, 2011 | 19 children (36.8% female) aged 7–11years        | 3-min: 40.2, 80.5, 120.7, 161 m/min | Actical (waist), Actical (ankle) | Not reported | ICC:<br>Waist: 0.927<br>Ankle: 0.854 (not specified by speeds) | MPE:<br>Waist: -11%<br>Ankle: -17%<br>(not specified by speeds) |

---

ICC = Intra-class coefficient; MAPE = Mean absolute percentage error; MPE = Mean percentage error
