# Supplementary material for: A catalog of validity indices for step counting wearable technologies during treadmill walking: the CADENCE-Kids study
Source: PubMed Central journal article supplement (PMC8283935; doi:10.1186/s12966-021-01167-y), 2021-07-16
Supplement: 12966_2021_1167_MOESM4_ESM.pdf [file 12966_2021_1167_MOESM4_ESM.pdf]

**Supplementary Table 1, Additional File 4.** Sample sizes (*N*) and number of steps derived from direct observation and each wearable technology by each treadmill speed for all sample (6–20 years old)

|                           | <b>Treadmill speed, km/h (mph)</b> |                  |                  |                  |                  |                  |                  |                  |                  |                  |
|---------------------------|------------------------------------|------------------|------------------|------------------|------------------|------------------|------------------|------------------|------------------|------------------|
|                           | <b>Slow</b>                        |                  |                  |                  | <b>Normal</b>    |                  |                  |                  | <b>Fast</b>      |                  |
|                           | <b>0.8 (0.5)</b>                   | <b>1.6 (1.0)</b> | <b>2.4 (1.5)</b> | <b>3.2 (2.0)</b> | <b>4.0 (2.5)</b> | <b>4.8 (3.0)</b> | <b>5.6 (3.5)</b> | <b>6.4 (4.0)</b> | <b>7.2 (4.5)</b> | <b>8.0 (5.0)</b> |
| <i>N</i>                  | 117                                | 117              | 115              | 113              | 110              | 104              | 93               | 81               | 53               | 16               |
| <b>Direct observation</b> | 321.6 ± 90.9                       | 396.7 ± 83.1     | 454.1 ± 71.3     | 503.5 ± 59.1     | 553.5 ± 51.5     | 592.1 ± 52.1     | 634.1 ± 56.6     | 684.8 ± 72.4     | 746.1 ± 70.6     | 762.1 ± 40.2     |
| Min–Max                   | 161–603                            | 255–617          | 338–709          | 396–736          | 472–706          | 508–816          | 535–850          | 577–895          | 611–870          | 693–858          |
| <b>Actical</b>            | 20.4 ± 49.5                        | 147 ± 95.5       | 350.3 ± 89.1     | 490.4 ± 61.3     | 550.7 ± 53       | 592.4 ± 53.3     | 635 ± 57.7       | 687.1 ± 77.5     | 748 ± 76.5       | 776.7 ± 40.6     |
| Min–Max                   | 0–377                              | 0–367            | 123–555          | 230–682          | 343–690          | 482–840          | 532–868          | 575–922          | 607–885          | 723–873          |
| <b>ActiGraph</b>          |                                    |                  |                  |                  |                  |                  |                  |                  |                  |                  |
| <b>GT3X+ (Waist)</b>      | 6.7 ± 22.7                         | 29.7 ± 33.3      | 138.2 ± 83.2     | 328.2 ± 93.9     | 490.4 ± 86.6     | 557.5 ± 88.8     | 604.4 ± 91       | 646.6 ± 116.9    | 715.8 ± 140.1    | 759.2 ± 85.4     |
| Min–Max                   | 0–215                              | 0–170            | 0–340            | 0–517            | 0–622            | 0–832            | 0–808            | 0–872            | 0–883            | 477–873          |
| <b>ActiGraph</b>          |                                    |                  |                  |                  |                  |                  |                  |                  |                  |                  |
| <b>GT3X+ (Wrist)</b>      | 38.9 ± 44.7                        | 118.1 ± 78       | 227.7 ± 85.7     | 307.8 ± 106.2    | 342.7 ± 121.9    | 363.6 ± 125      | 368 ± 118        | 370.7 ± 119.1    | 378.3 ± 94.1     | 403.2 ± 56.6     |
| Min–Max                   | 0–227                              | 0–347            | 0–428            | 0–532            | 0–582            | 0–615            | 0–593            | 0–648            | 0–630            | 362–603          |
| <b>ActivPAL</b>           | 138.6 ± 119.4                      | 364.6 ± 107.7    | 447 ± 82.2       | 497.6 ± 74.6     | 543.3 ± 70.8     | 581.5 ± 72.3     | 620.2 ± 79.8     | 648.2 ± 109.2    | 679 ± 178.6      | 706.7 ± 197.7    |
| Min–Max                   | 0–590                              | 100–597          | 210–697          | 257–737          | 290–703          | 313–783          | 337–810          | 17–823           | 10–817           | 30–820           |
| <b>Digiwalker</b>         |                                    |                  |                  |                  |                  |                  |                  |                  |                  |                  |
| <b>SW-200</b>             | 51.6 ± 62.8                        | 151.8 ± 123.4    | 312.6 ± 138.8    | 433.3 ± 105.2    | 524.1 ± 83.8     | 577.6 ± 81.8     | 628.8 ± 87.7     | 679.5 ± 108      | 747.8 ± 71.4     | 774.9 ± 37.9     |
| Min–Max                   | 0–507                              | 0–484            | 2–635            | 3–687            | 106–676          | 167–811          | 0–829            | 6–912            | 604–879          | 716–863          |
| <b>NL-1000</b>            | 30.6 ± 52.9                        | 92.3 ± 102.5     | 297.2 ± 119.5    | 449.9 ± 86.5     | 534.6 ± 78.3     | 575.5 ± 96.8     | 626.2 ± 71.1     | 680.2 ± 76.5     | 743.4 ± 75       | 771.8 ± 35.8     |
| Min–Max                   | 0–481                              | 0–506            | 2–651            | 273–684          | 0–683            | 0–828            | 268–858          | 571–898          | 604–879          | 714–853          |
| <b>SenseWear</b>          | 4.4 ± 6.5                          | 13.5 ± 26.5      | 60.2 ± 111       | 131.2 ± 179.5    | 181 ± 234.1      | 227.2 ± 265.6    | 243.3 ± 279.2    | 282.2 ± 298.7    | 293 ± 318.6      | 324.7 ± 320.6    |
| Min–Max                   | 0–58                               | 0–170            | 0–485            | 0–567            | 0–625            | 10–835           | 8–692            | 22–885           | 0–880            | 76–822           |
| <b>StepWatch</b>          | 276 ± 101.1                        | 395.1 ± 96.7     | 448 ± 90.3       | 496.8 ± 86.9     | 543.6 ± 88.4     | 584.8 ± 70.6     | 612.9 ± 74.7     | 623.9 ± 87.1     | 586.1 ± 102.5    | 580.6 ± 43.8     |
| Min–Max                   | 0–573                              | 0–603            | 0–663            | 0–690            | 0–693            | 0–690            | 0–690            | 0–710            | 0–723            | 523–700          |

Values represent the average number of steps ± standard deviation, unless otherwise indicated.

**Supplementary Table 2, Additional File 4.** Sample sizes (*N*) and number of steps derived from direct observation and each wearable technology by each treadmill speed for children (6–12 years old)

|                                | Treadmill speed, km/h (mph) |               |               |               |               |               |               |               |               |           |
|--------------------------------|-----------------------------|---------------|---------------|---------------|---------------|---------------|---------------|---------------|---------------|-----------|
|                                | Slow                        |               |               |               | Normal        |               |               |               | Fast          |           |
|                                | 0.8 (0.5)                   | 1.6 (1.0)     | 2.4 (1.5)     | 3.2 (2.0)     | 4.0 (2.5)     | 4.8 (3.0)     | 5.6 (3.5)     | 6.4 (4.0)     | 7.2 (4.5)     | 8.0 (5.0) |
| <i>N</i>                       | 53                          | 53            | 51            | 49            | 47            | 42            | 34            | 24            | 10            | 0         |
| <b>Direct observation</b>      | 378.5 ± 83.1                | 451.3 ± 74.8  | 503.2 ± 66.9  | 546.0 ± 58.9  | 595.6 ± 42.8  | 630.0 ± 55.5  | 682.2 ± 59.9  | 742.5 ± 81.7  | 809.7 ± 64.2  | –         |
| Min–Max                        | 190–603                     | 320–617       | 407–709       | 403–736       | 518–706       | 508–816       | 601–850       | 638–895       | 659–870       | –         |
| <b>Actical</b>                 | 39.5 ± 67.6                 | 153.8 ± 91.8  | 384.4 ± 81.4  | 533.4 ± 49.9  | 594.0 ± 39.1  | 632.7 ± 55.4  | 684.9 ± 59.9  | 746.0 ± 90.4  | 803.2 ± 89.7  | –         |
| Min–Max                        | 0–376                       | 0–356         | 190–548       | 420–681       | 523–690       | 486–840       | 601–868       | 626–921       | 611–885       | –         |
| <b>ActiGraph GT3X+ (Waist)</b> | 13.1 ± 32.3                 | 41.4 ± 35.9   | 157.0 ± 76.9  | 345.4 ± 86.2  | 518.3 ± 65.9  | 595.5 ± 58.1  | 654.8 ± 51.7  | 702.9 ± 101.1 | 747.5 ± 183.9 | –         |
| Min–Max                        | 0–215                       | 0–170         | 6–308         | 175–500       | 338–621       | 446–831       | 533–808       | 528–871       | 340–883       | –         |
| <b>ActiGraph GT3X+ (Wrist)</b> | 64.5 ± 49.5                 | 146.9 ± 77.6  | 241.6 ± 79.4  | 310.3 ± 105.7 | 350.7 ± 120.6 | 376.7 ± 120.3 | 379.7 ± 112.7 | 379.7 ± 97.4  | 415.5 ± 30.2  | –         |
| Min–Max                        | 3–226                       | 1–346         | 83–428        | 36–531        | 31–581        | 80–615        | 96–593        | 161–586       | 361–470       | –         |
| <b>ActivPAL</b>                | 172.8 ± 132.7               | 411.8 ± 106.3 | 496.1 ± 79.8  | 543.4 ± 71.5  | 587.1 ± 63.8  | 621.0 ± 73.3  | 664.7 ± 81.6  | 676.7 ± 90.3  | 721.0 ± 115.6 | –         |
| Min–Max                        | 0–590                       | 160–596       | 283–696       | 316–736       | 346–703       | 366–783       | 396–810       | 423–800       | 420–806       | –         |
| <b>Digiwalker SW-200</b>       | 74.1 ± 85.1                 | 192.2 ± 139.7 | 349.1 ± 148.1 | 464.0 ± 127.9 | 551.9 ± 107.9 | 598.1 ± 121.7 | 668.1 ± 131.8 | 719.1 ± 174.3 | 817.3 ± 58.2  | –         |
| Min–Max                        | 0–507                       | 1–484         | 2–635         | 3–687         | 106–676       | 167–811       | 0–829         | 6–912         | 690–879       | –         |
| <b>NL-1000</b>                 | 46.4 ± 74.5                 | 128.2 ± 120.8 | 319.2 ± 103.3 | 490.1 ± 66.1  | 583.9 ± 46.5  | 610.9 ± 112.7 | 672.4 ± 93.6  | 741.5 ± 84.4  | 793.6 ± 85.0  | –         |
| Min–Max                        | 0–481                       | 0–506         | 142–544       | 314–639       | 459–683       | 0–828         | 268–858       | 628–898       | 631–879       | –         |
| <b>SenseWear</b>               | 6.3 ± 8.9                   | 20.2 ± 30.9   | 69.4 ± 108.1  | 132.6 ± 182.8 | 195.9 ± 247.5 | 250.2 ± 284.6 | 243.2 ± 288.5 | 298.9 ± 323.0 | 149.2 ± 260.0 | –         |
| Min–Max                        | 0–58                        | 0–141         | 0–393         | 0–566         | 0–625         | 18–835        | 23–691        | 29–885        | 0–880         | –         |
| <b>StepWatch</b>               | 320.7 ± 102.8               | 446.4 ± 97.9  | 494.8 ± 92.8  | 539.3 ± 91.3  | 582.4 ± 94.2  | 624.5 ± 31.0  | 642.0 ± 39.3  | 623.1 ± 68.6  | 571.0 ± 46.1  | –         |
| Min–Max                        | 0–573                       | 0–603         | 0–663         | 0–690         | 0–693         | 556–690       | 543–690       | 426–696       | 483–653       | –         |

Values represent the average number of steps ± standard deviation, unless otherwise indicated.

**Supplementary Table 3, Additional File 4.** Sample sizes (*N*) and number of steps derived from direct observation and each wearable technology by each treadmill speed for adolescents (13–17 years old)

|                           | Treadmill speed, km/h (mph) |              |               |               |               |               |               |               |               |               |
|---------------------------|-----------------------------|--------------|---------------|---------------|---------------|---------------|---------------|---------------|---------------|---------------|
|                           | Slow                        |              |               |               | Normal        |               |               |               | Fast          |               |
|                           | 0.8 (0.5)                   | 1.6 (1.0)    | 2.4 (1.5)     | 3.2 (2.0)     | 4.0 (2.5)     | 4.8 (3.0)     | 5.6 (3.5)     | 6.4 (4.0)     | 7.2 (4.5)     | 8.0 (5.0)     |
| <i>N</i>                  | 40                          | 40           | 40            | 40            | 39            | 39            | 36            | 34            | 25            | 6             |
| <b>Direct observation</b> | 290.1 ± 68.9                | 361.1 ± 58.8 | 418.8 ± 42    | 474.1 ± 33.1  | 525.5 ± 32.6  | 568.8 ± 31.6  | 607.4 ± 32.8  | 662.3 ± 52.7  | 746 ± 66.6    | 750.8 ± 32    |
| Min–Max                   | 162–453                     | 255–486      | 338–498       | 396–536       | 474–621       | 512–640       | 535–666       | 587–822       | 626–843       | 712–802       |
| <b>Actical</b>            | 4.8 ± 13                    | 124.8 ± 92.9 | 314 ± 85.6    | 456.1 ± 53.2  | 518.2 ± 41.1  | 566.3 ± 31.7  | 609.9 ± 33.1  | 664.6 ± 56.8  | 751.8 ± 71    | 757.5 ± 31    |
| Min–Max                   | 0–55                        | 0–318        | 142–555       | 230–538       | 343–567       | 482–612       | 532–672       | 575–833       | 615–860       | 723–805       |
| <b>ActiGraph</b>          |                             |              |               |               |               |               |               |               |               |               |
| <b>GT3X+ (Waist)</b>      | 1.2 ± 2.7                   | 21.1 ± 29.1  | 124.6 ± 80.9  | 312.5 ± 91.9  | 477.8 ± 70.6  | 539.4 ± 69.4  | 586.5 ± 51.2  | 629.2 ± 74.8  | 741.7 ± 68.3  | 711.9 ± 119.5 |
| Min–Max                   | 0–13                        | 0–127        | 0–305         | 77–503        | 267–563       | 292–600       | 408–655       | 463–833       | 610–842       | 477–807       |
| <b>ActiGraph</b>          |                             |              |               |               |               |               |               |               |               |               |
| <b>GT3X+ (Wrist)</b>      | 15.6 ± 17.4                 | 92.7 ± 68.5  | 214.2 ± 92.1  | 302.4 ± 112.8 | 334.3 ± 127.8 | 359.1 ± 133.5 | 355.1 ± 116.3 | 346.6 ± 120.2 | 363.3 ± 79.7  | 419.2 ± 90.8  |
| Min–Max                   | 0–68                        | 5–292        | 2–403         | 2–478         | 5–553         | 2–580         | 3–568         | 7–618         | 87–478        | 367–603       |
| <b>ActivPAL</b>           | 120.1 ± 102.4               | 335.2 ± 98.7 | 407.8 ± 65.4  | 460.6 ± 65.5  | 507.4 ± 68.4  | 550.2 ± 71.1  | 591.1 ± 83.6  | 621.7 ± 140.9 | 636.3 ± 241.4 | 708.9 ± 120.8 |
| Min–Max                   | 0–443                       | 100–500      | 210–500       | 257–540       | 290–567       | 313–613       | 337–747       | 17–823        | 10–817        | 470–803       |
| <b>Digiwalker</b>         |                             |              |               |               |               |               |               |               |               |               |
| <b>SW-200</b>             | 32.9 ± 20                   | 127.7 ± 98.7 | 284.6 ± 116.2 | 412.5 ± 72.7  | 506.3 ± 46    | 566.8 ± 29.7  | 610.1 ± 30.1  | 665.4 ± 56    | 747.6 ± 65    | 756.5 ± 30.4  |
| Min–Max                   | 8–95                        | 3–426        | 90–565        | 247–626       | 369–587       | 504–636       | 558–666       | 600–825       | 626–846       | 716–797       |
| <b>NL-1000</b>            | 17.9 ± 10.3                 | 67.4 ± 77.9  | 270 ± 124.3   | 418.1 ± 91.1  | 511.1 ± 43.8  | 562.6 ± 29.1  | 601.9 ± 36    | 657.4 ± 54.5  | 749 ± 71.1    | 754.8 ± 30.6  |
| Min–Max                   | 8–60                        | 0–292        | 13–521        | 274–684       | 380–638       | 512–611       | 516–663       | 574–829       | 614–864       | 714–799       |
| <b>SenseWear</b>          | 3.3 ± 2.3                   | 9.8 ± 26.3   | 47.1 ± 103.9  | 106.5 ± 160.1 | 139.9 ± 209.3 | 190.4 ± 245.9 | 226.9 ± 272.9 | 256.3 ± 278.5 | 311.8 ± 319.1 | 369.6 ± 318.7 |
| Min–Max                   | 0–8                         | 0–170        | 0–485         | 0–478         | 0–547         | 10–587        | 8–617         | 22–715        | 32–813        | 97–780        |
| <b>StepWatch</b>          | 248.9 ± 83.5                | 364.1 ± 57.6 | 419.9 ± 41.8  | 473.7 ± 33.8  | 524.7 ± 29    | 569.3 ± 28.9  | 609.7 ± 33.4  | 645.3 ± 36.5  | 596.1 ± 61.6  | 596.7 ± 52.5  |
| Min–Max                   | 97–450                      | 273–493      | 357–507       | 400–543       | 477–570       | 517–613       | 533–677       | 560–710       | 517–723       | 557–700       |

Values represent the average number of steps ± standard deviation, unless otherwise indicated.

**Supplementary Table 4, Additional File 4.** Sample sizes (*N*) and number of steps derived from direct observation and each wearable technology by each treadmill speed for young adults (18–20 years old)

|                           | Treadmill speed, km/h (mph) |               |               |               |               |               |               |               |               |               |
|---------------------------|-----------------------------|---------------|---------------|---------------|---------------|---------------|---------------|---------------|---------------|---------------|
|                           | Slow                        |               |               |               | Normal        |               |               |               | Fast          |               |
|                           | 0.8 (0.5)                   | 1.6 (1.0)     | 2.4 (1.5)     | 3.2 (2.0)     | 4.0 (2.5)     | 4.8 (3.0)     | 5.6 (3.5)     | 6.4 (4.0)     | 7.2 (4.5)     | 8.0 (5.0)     |
| <i>N</i>                  | 24                          | 24            | 24            | 24            | 24            | 23            | 23            | 23            | 18            | 10            |
| <b>Direct observation</b> | 248.6 ± 56.9                | 335.4 ± 58.1  | 408.5 ± 52.9  | 466 ± 33.3    | 516.9 ± 28.1  | 562.4 ± 24.8  | 604.5 ± 25    | 657.8 ± 52.5  | 710.9 ± 55.6  | 768.8 ± 44.5  |
| Min–Max                   | 161–427                     | 273–532       | 347–575       | 414–539       | 472–570       | 515–599       | 547–637       | 577–771       | 611–798       | 693–858       |
| <b>Actical</b>            | 4.2 ± 13.8                  | 168.8 ± 104.4 | 338.3 ± 86.5  | 459.7 ± 36.4  | 518.7 ± 28.4  | 563.3 ± 25.2  | 600.5 ± 26.1  | 658.9 ± 55    | 712 ± 57.7    | 788.2 ± 42.7  |
| Min–Max                   | 0–65                        | 0–367         | 123–478       | 388–533       | 470–572       | 512–607       | 543–645       | 578–778       | 607–800       | 732–873       |
| <b>ActiGraph</b>          |                             |               |               |               |               |               |               |               |               |               |
| <b>GT3X+ (Waist)</b>      | 1.7 ± 6.8                   | 18.2 ± 25.7   | 120.9 ± 94.4  | 319 ± 109.3   | 456.5 ± 124.6 | 518.8 ± 132   | 557.9 ± 140.4 | 613.7 ± 159.8 | 662.2 ± 176   | 787.5 ± 42.9  |
| Min–Max                   | 0–33                        | 0–113         | 0–340         | 0–517         | 0–572         | 0–607         | 0–643         | 0–780         | 0–800         | 732–873       |
| <b>ActiGraph</b>          |                             |               |               |               |               |               |               |               |               |               |
| <b>GT3X+ (Wrist)</b>      | 21.1 ± 34.9                 | 96.8 ± 74.7   | 220.8 ± 86.6  | 311.6 ± 99.7  | 340.4 ± 118.7 | 347.3 ± 121.6 | 371 ± 131.2   | 397 ± 135.1   | 378.4 ± 128.4 | 393.7 ± 21.9  |
| Min–Max                   | 0–160                       | 0–265         | 0–352         | 0–467         | 0–493         | 0–530         | 0–558         | 0–648         | 0–630         | 362–437       |
| <b>ActivPAL</b>           | 94 ± 94.6                   | 309.6 ± 81    | 407.8 ± 52.3  | 465.8 ± 35.3  | 516 ± 31.8    | 562.6 ± 25    | 599.9 ± 25.2  | 657.8 ± 54.8  | 715 ± 55.3    | 705.3 ± 238.8 |
| Min–Max                   | 0–377                       | 153–540       | 347–580       | 407–543       | 457–573       | 513–600       | 547–640       | 577–777       | 607–793       | 30–820        |
| <b>Digiwalker</b>         |                             |               |               |               |               |               |               |               |               |               |
| <b>SW-200</b>             | 33 ± 26.2                   | 102.8 ± 94.2  | 281.5 ± 139.9 | 405.2 ± 85.1  | 498.4 ± 60.4  | 558.3 ± 27.9  | 600.1 ± 29.4  | 659 ± 58.9    | 709.5 ± 58.7  | 786 ± 38.9    |
| Min–Max                   | 11–108                      | 0–287         | 16–541        | 166–581       | 342–592       | 507–599       | 539–642       | 575–784       | 604–801       | 727–863       |
| <b>NL-1000</b>            | 16.7 ± 17.6                 | 54.4 ± 64.7   | 295.8 ± 138   | 421 ± 84.8    | 476.3 ± 110.2 | 532.9 ± 119   | 595.8 ± 26.7  | 650.1 ± 59.4  | 707.8 ± 58.2  | 782 ± 36.1    |
| Min–Max                   | 0–96                        | 0–255         | 2–651         | 273–581       | 0–566         | 0–600         | 540–641       | 571–777       | 604–797       | 732–853       |
| <b>SenseWear</b>          | 2 ± 1.9                     | 4.7 ± 4       | 62.7 ± 130.1  | 169.4 ± 202.9 | 218.6 ± 245.2 | 247.8 ± 266.7 | 269 ± 285.4   | 302.9 ± 311.7 | 346.7 ± 339.5 | 297.8 ± 335.8 |
| Min–Max                   | 0–6                         | 0–17          | 0–478         | 9–528         | 12–545        | 16–592        | 20–620        | 25–780        | 28–812        | 76–822        |
| <b>StepWatch</b>          | 222.2 ± 83.4                | 333.8 ± 90.3  | 395.3 ± 98.2  | 448.5 ± 101.2 | 498.2 ± 109.9 | 538.7 ± 120.2 | 575.1 ± 128.1 | 593.2 ± 137.6 | 580.6 ± 159.1 | 571 ± 37.3    |
| Min–Max                   | 0–433                       | 0–543         | 0–587         | 0–547         | 0–570         | 0–603         | 0–640         | 0–677         | 0–700         | 523–633       |

Values represent the average number of steps ± standard deviation, unless otherwise indicated.
