# Supplementary material for: A catalog of validity indices for step counting wearable technologies during treadmill walking: the CADENCE-Kids study
Source: PubMed Central journal article supplement (PMC8283935; doi:10.1186/s12966-021-01167-y), 2021-07-16
Supplement: 12966_2021_1167_MOESM7_ESM.pdf [file 12966_2021_1167_MOESM7_ESM.pdf]

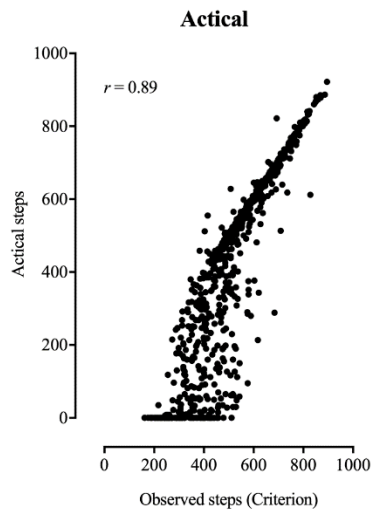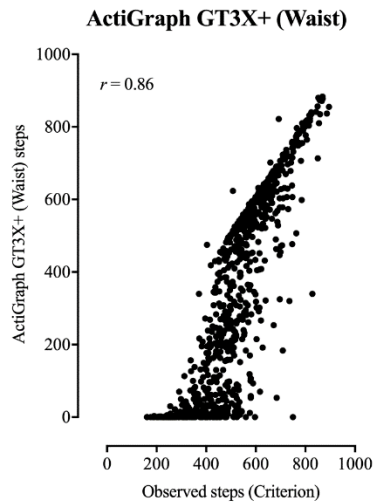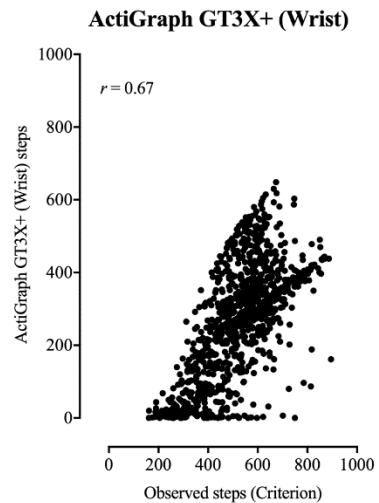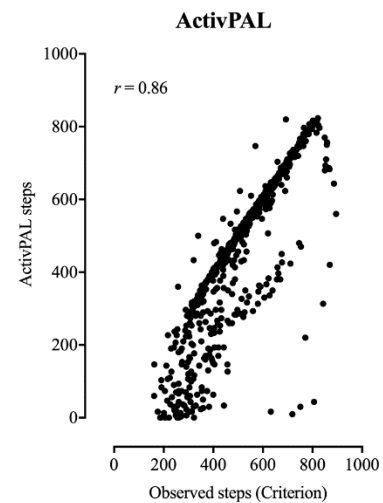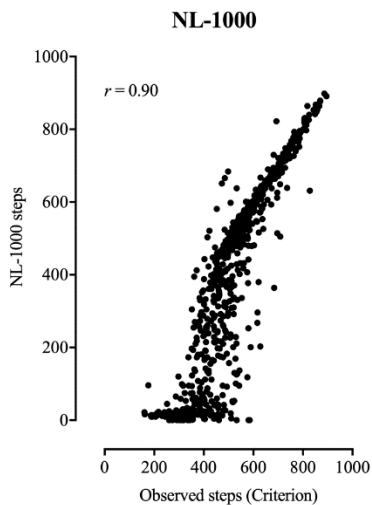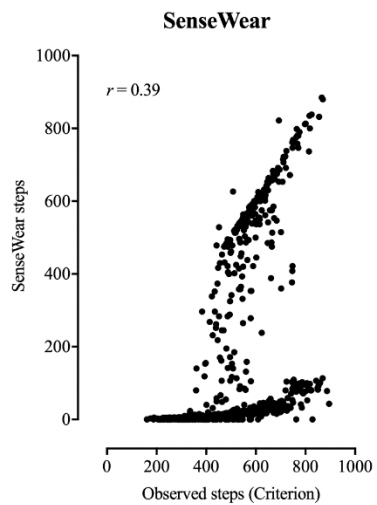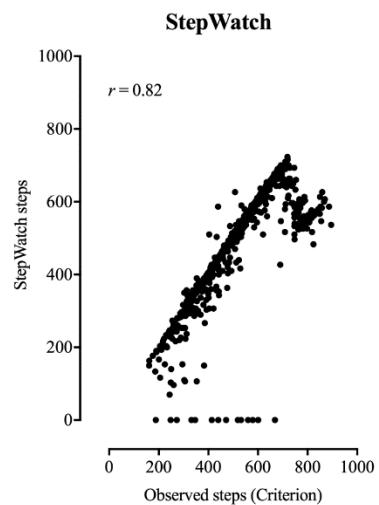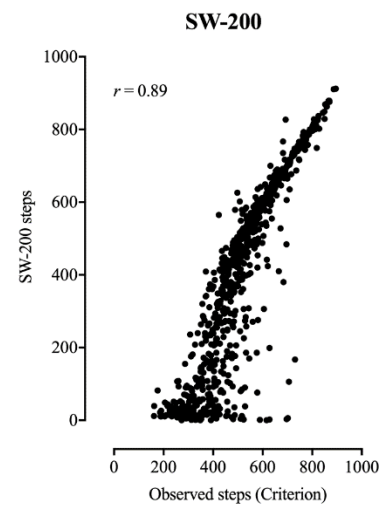

**Supplementary Figure 1, Additional File 7.** Representation of the correlation between directly observed steps and steps derived from wearable technologies across all walking bouts. The X-Y scatterplot is representative of how tightly the wearable technology step counts hold to a linear relationship to directly observed steps across all walking bouts. X axis represents directly observed steps, and Y axis represents steps derived from wearable technology. Correlation coefficients ( $r$ ) closer to 1.0 indicate tighter relationship (more precise) to directly observed steps.
